# Supplementary material
Source: publisher figshare collection journal article supplement (https://tandf.figshare.com/ndownloader/files/39647024)
Supplement: Supplementary file 1 [file 39647024]

**Supplementary Material**

Absence of inertial load on hand decreases task performance in virtual reality interaction

Min Tang, Xiaoyu Liu, Ying Dong, Zhili Tang, Hongqiang Huo, Linyuan Fan, Xiaofeng Qiao, Duo Chen, Jinghui Wang, Xin Du, Jieyi Guo, Yubo Fan

**Supplementary Table 1**

Results of permutation tests on the trial-to-trial spatial variability

| Time courses | *p*-value between zero- and low-mass condition | *p*-value between zero- and high-mass condition | *p*-value between low- and high-mass condition |
| --- | --- | --- | --- |
| 1 | 0.073 | < 0.001*** | 0.494 |
| 2 | 0.002** | < 0.001*** | 0.501 |
| 3 | < 0.001*** | < 0.001*** | 0.473 |
| 4 | < 0.001*** | < 0.001*** | 0.176 |
| 5 | < 0.001*** | < 0.001*** | 0.092 |
| 6 | < 0.001*** | < 0.001*** | 0.149 |
| 7 | < 0.001*** | < 0.001*** | 0.338 |
| 8 | 0.002** | < 0.001*** | 0.443 |
| 9 | 0.019** | 0.008** | 0.497 |
| 10 | 0.045** | 0.028** | 0.717 |
| 11 | 0.070 | 0.115 | 0.894 |
| 12 | 0.343 | 0.478 | 0.711 |
| 13 | 0.451 | 0.727 | 0.521 |
| 14 | 0.513 | 0.882 | 0.443 |
| 15 | 0.470 | 0.979 | 0.327 |
| 16 | 0.385 | 0.908 | 0.243 |
| 17 | 0.568 | 0.943 | 0.555 |
| 18 | 0.989 | 0.927 | 0.991 |
| 19 | 0.751 | 0.510 | 0.902 |
| 20 | 0.574 | 0.269 | 0.854 |
| 21 | 0.344 | 0.326 | 0.898 |
| 22 | 0.067 | 0.192 | 0.664 |
| 23 | 0.071 | 0.270 | 0.598 |
| 24 | 0.034 | 0.281 | 0.424 |
| 25 | 0.004** | 0.021* | 0.471 |

*Note*. ** *p* < 0.01, ****p* < 0.001.
